# Supplementary material
Source: ML conference proceedings conference paper supplement (https://openaccess.thecvf.com/content/CVPR2024/html/Huang_Bridging_the_Gap_CVPR_2024_paper.html)
Supplement: Supplementary file 1 [file Huang_Bridging_the_Gap_CVPR_2024_supplemental.pdf]

# Bridging the Gap Between End-to-End and Two-Step Text Spotting

## Supplementary Materials

### A. Performance on TextOCR and HierText

We conduct experiments on more challenging benchmarks on TextOCR [7] and HierText [4] to verify the effectiveness of our methods. For TextOCR, we adopt a detector similar to the GLASS [6] and use the DiG [8] as the recognizer. For HierText, we utilize the DBNet++ [3] as the detector and MAERec [1] as the recognizer. As shown in Tab. 1, the results demonstrate the effectiveness of our method.

Table 1. End-to-end text spotting results on TextOCR and HierText.

| Method                 | TextOCR | HierText |
|------------------------|---------|----------|
| MaskTextSpotter v3 [2] | 50.8    | –        |
| GLASS [6]              | 67.1    | –        |
| HTS [5]                | –       | 75.6     |
| Ours                   | 68.5    | 76.1     |

### References

- [1] Qing Jiang, Jiapeng Wang, Dezhi Peng, Chongyu Liu, and Lianwen Jin. Revisiting scene text recognition: A data perspective. In *Proceedings of the IEEE/CVF International Conference on Computer Vision*, pages 20543–20554, 2023. 1
- [2] Minghui Liao, Guan Pang, Jing Huang, Tal Hassner, and Xiang Bai. Mask textspotter v3: Segmentation proposal network for robust scene text spotting. In *Computer Vision–ECCV 2020: 16th European Conference, Glasgow, UK, August 23–28, 2020, Proceedings, Part XI 16*, pages 706–722. Springer, 2020. 1
- [3] Minghui Liao, Zhisheng Zou, Zhaoyi Wan, Cong Yao, and Xiang Bai. Real-time scene text detection with differentiable binarization and adaptive scale fusion. *IEEE Transactions on Pattern Analysis and Machine Intelligence*, 2022. 1
- [4] Shangbang Long, Siyang Qin, Dmitry Panteleev, Alessandro Bissacco, Yasuhisa Fujii, and Michalis Raptis. Towards end-to-end unified scene text detection and layout analysis. In *Proceedings of the IEEE/CVF Conference on Computer Vision and Pattern Recognition*, pages 1049–1059, 2022. 1
- [5] Shangbang Long, Siyang Qin, Yasuhisa Fujii, Alessandro Bissacco, and Michalis Raptis. Hierarchical text spotter for joint text spotting and layout analysis. In *Proceedings of the IEEE/CVF Winter Conference on Applications of Computer Vision*, pages 903–913, 2024. 1
- [6] Roi Ronen, Shahar Tsiper, Oron Anshel, Inbal Lavi, Amir Markovitz, and R Manmatha. GLASS: Global to local attention for scene-text spotting. In *European Conference on Computer Vision*, pages 249–266. Springer, 2022. 1
- [7] Amanpreet Singh, Guan Pang, Mandy Toh, Jing Huang, Wojciech Galuba, and Tal Hassner. Textocr: Towards large-scale end-to-end reasoning for arbitrary-shaped scene text. In *Proceedings of the IEEE/CVF conference on computer vision and pattern recognition*, pages 8802–8812, 2021. 1
- [8] Mingkun Yang, Minghui Liao, Pu Lu, Jing Wang, Sheng-gao Zhu, Hualin Luo, Qi Tian, and Xiang Bai. Reading and writing: Discriminative and generative modeling for self-supervised text recognition. In *Proceedings of the 30th ACM International Conference on Multimedia*, pages 4214–4223, 2022. 1
